# Supplementary material for: Nickel-doped pyrrhotite iron sulfide nanosheets as a highly efficient electrocatalyst for water splitting
Source: Royal Society of Chemistry journal article supplement (doi:10.1039/d0ta07624d), 2020-01-01
Supplement: d0ta07624d1.pdf [file d0ta07624d1.pdf]

## Supplementary Information

# Nickel-Doped Pyrrhotite Iron Sulfide Nanosheets as Highly Efficient Electrocatalysts for Water Splitting

*Zhongxin Jing,<sup>a</sup> Qingyun Zhao,<sup>a</sup> Dehua Zheng,<sup>\*a</sup> Lei Sun,<sup>a</sup> Jiahui Geng,<sup>a</sup> Qiannan  
Zhou,<sup>a</sup> and Jianjian Lin<sup>\*a</sup>*

*<sup>a</sup> Key Laboratory of Eco-chemical Engineering, College of Chemistry and Molecular Engineering,  
Qingdao University of Science and Technology, Qingdao 266042, PR China*

---

\*Corresponding author: Dehua Zheng; Jianjian Lin

Email address: [Zhengdehua@qust.edu.cn](mailto:Zhengdehua@qust.edu.cn); [Jianjian\\_Lin@qust.edu.cn](mailto:Jianjian_Lin@qust.edu.cn)

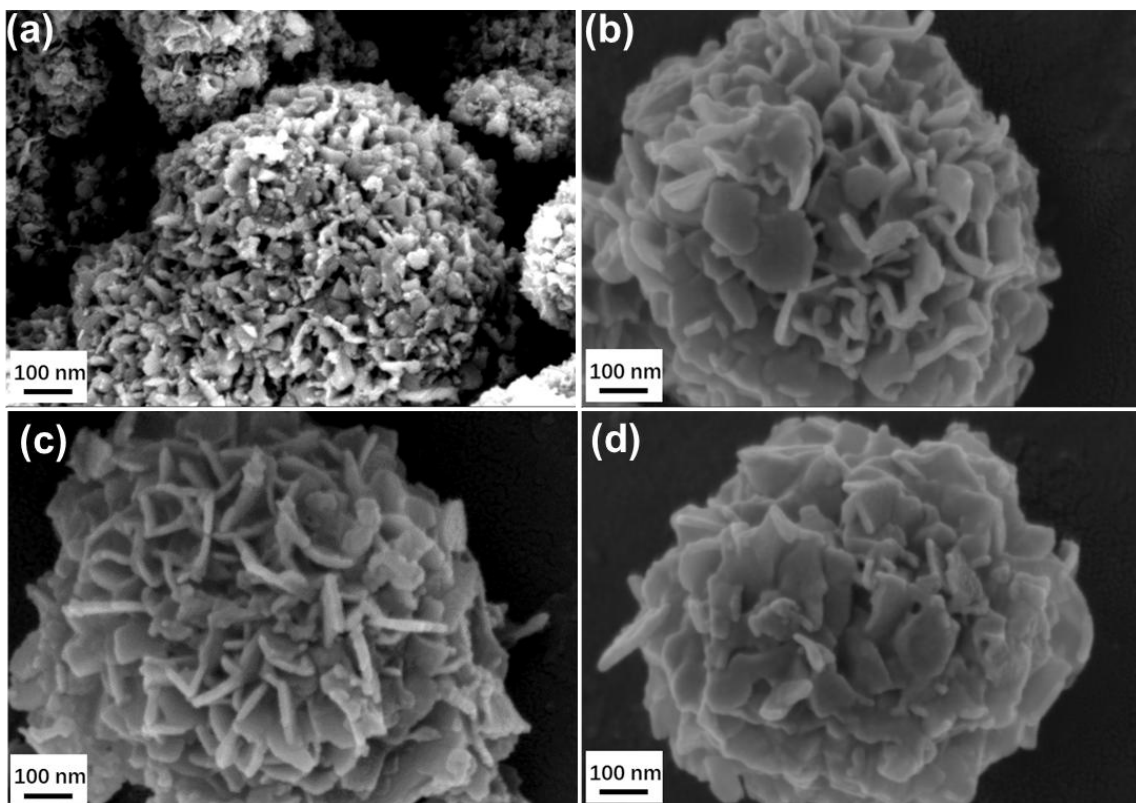

Figure S1 SEM image of (a)  $\text{Fe}_{0.95}\text{S}_{1.05}$  (b)  $\text{Fe}_{0.9}\text{Ni}_{0.05}\text{S}_{1.05}$  (c)  $\text{Fe}_{0.85}\text{Ni}_{0.1}\text{S}_{1.05}$  (d)  $\text{Fe}_{0.75}\text{Ni}_{0.2}\text{S}_{1.05}$ .

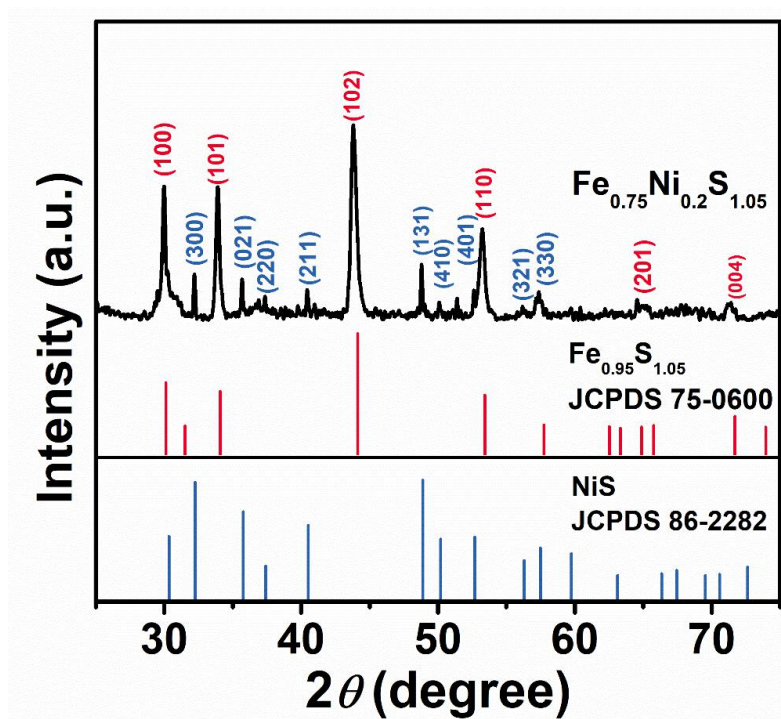

Figure S2 XRD pattern of  $\text{Fe}_{0.75}\text{Ni}_{0.2}\text{S}_{1.05}$ .

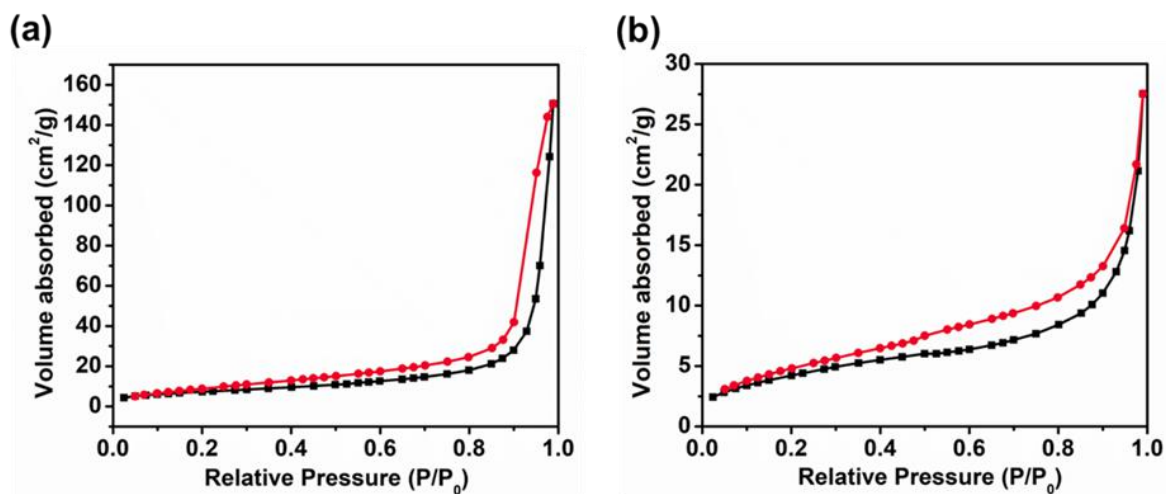

**Figure S3** Nitrogen isotherm and pore size distribution of (a)  $\text{Fe}_{0.95}\text{S}_{1.05}$  and (b)  $\text{Fe}_{0.8}\text{Ni}_{0.15}\text{S}_{1.05}$  catalysts

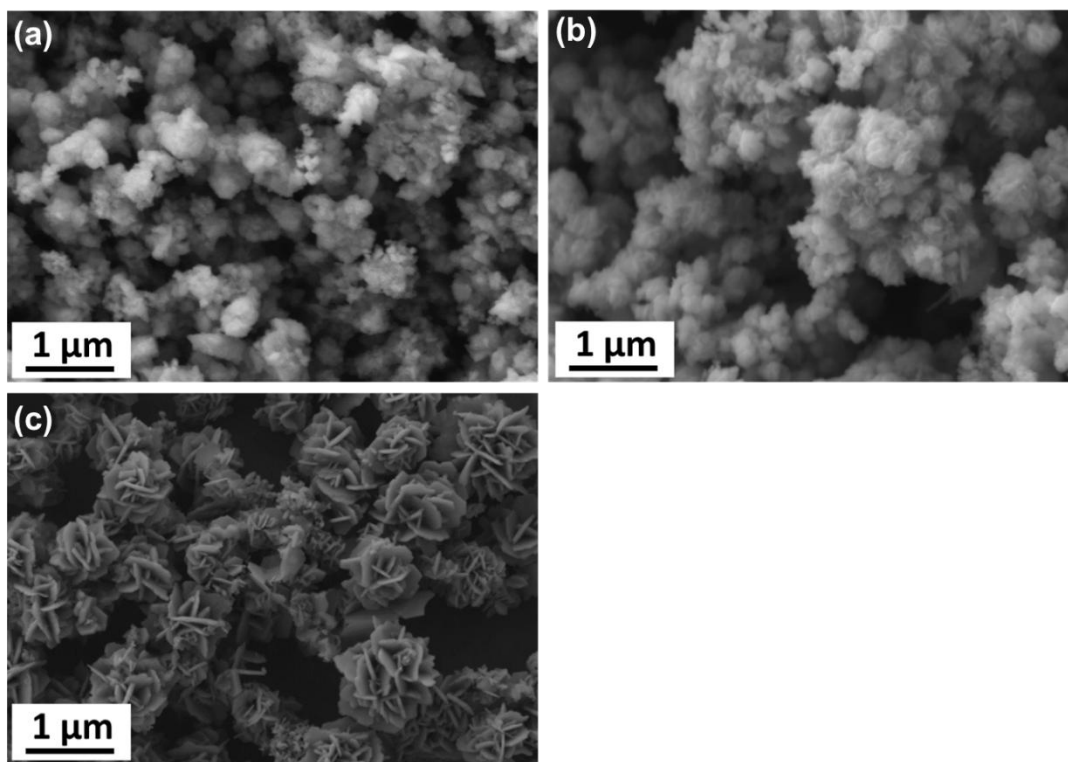

**Figure S4** SEM images of the  $\text{Fe}_{0.8}\text{Ni}_{0.15}\text{S}_{1.05}$  products synthesized at various reaction temperatures, (a) 150 °C, (b) 180 °C, (c) 210 °C for 16 h.

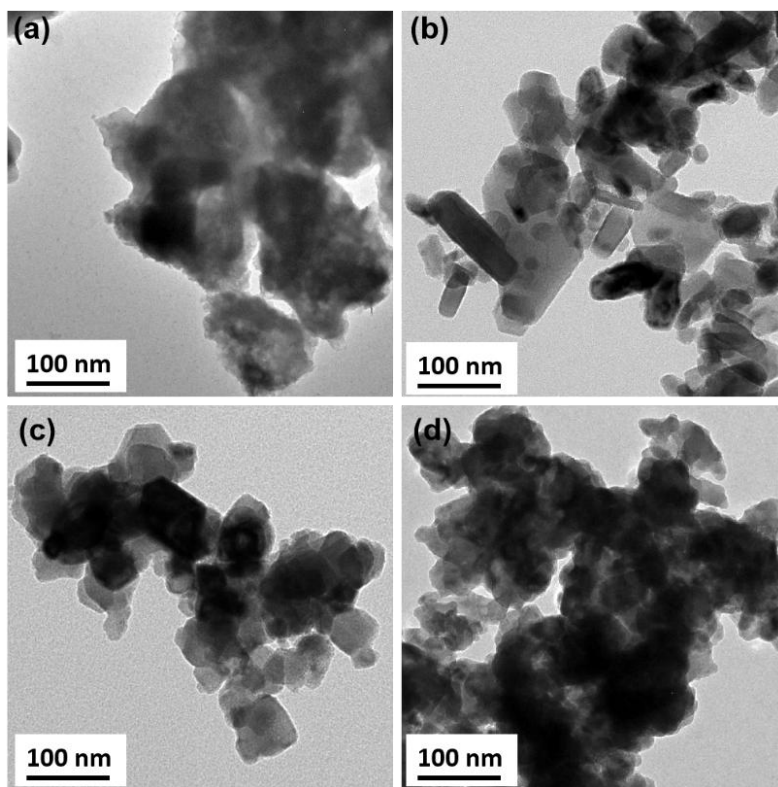

**Figure S5** TEM images of as-prepared products obtained via hydrothermal reaction after (a) 1 h, (b) 5 h, (c) 10 h and (d) 15 h

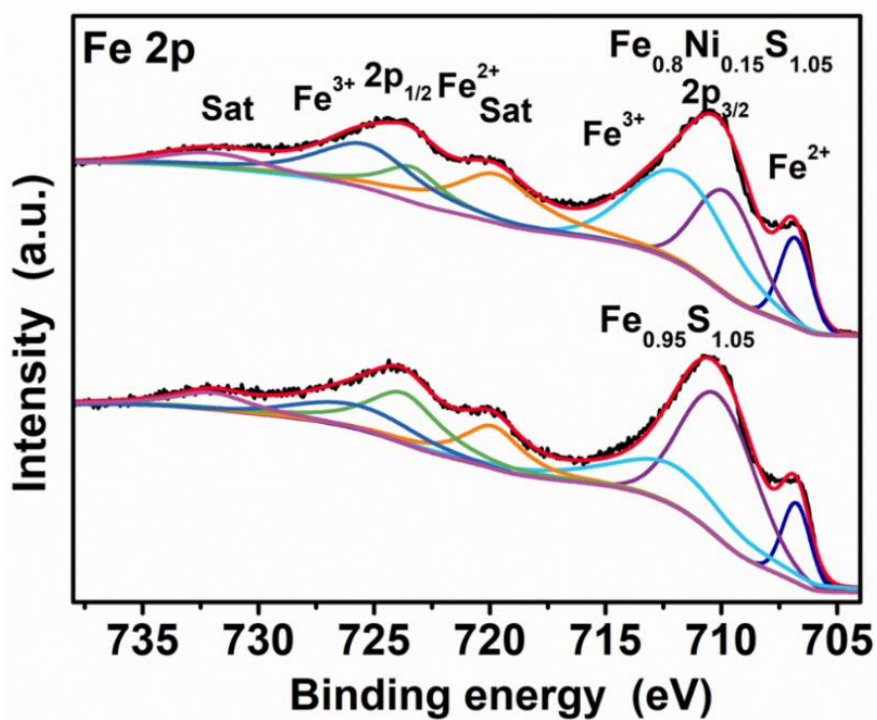

**Figure S6** Fe 2p and high-resolution XPS of  $\text{Fe}_{0.8}\text{Ni}_{0.15}\text{S}_{1.05}$  catalyst and  $\text{Fe}_{0.95}\text{S}_{1.05}$ .

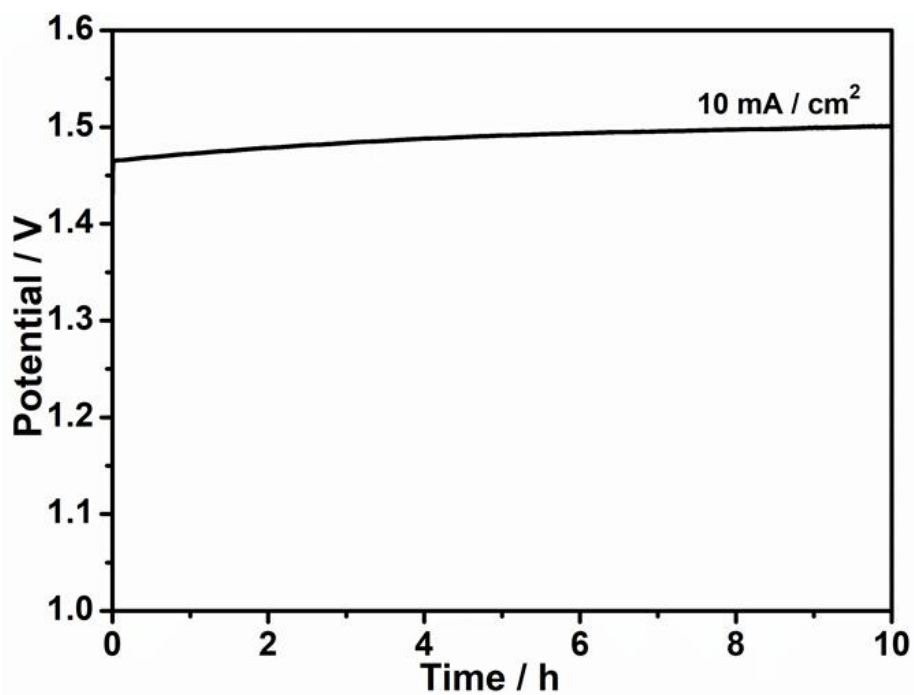

Figure S7 *E-t* curves of  $\text{Fe}_{0.8}\text{Ni}_{0.15}\text{S}_{1.05}$  at a potential of 1.47 V for 10 h.

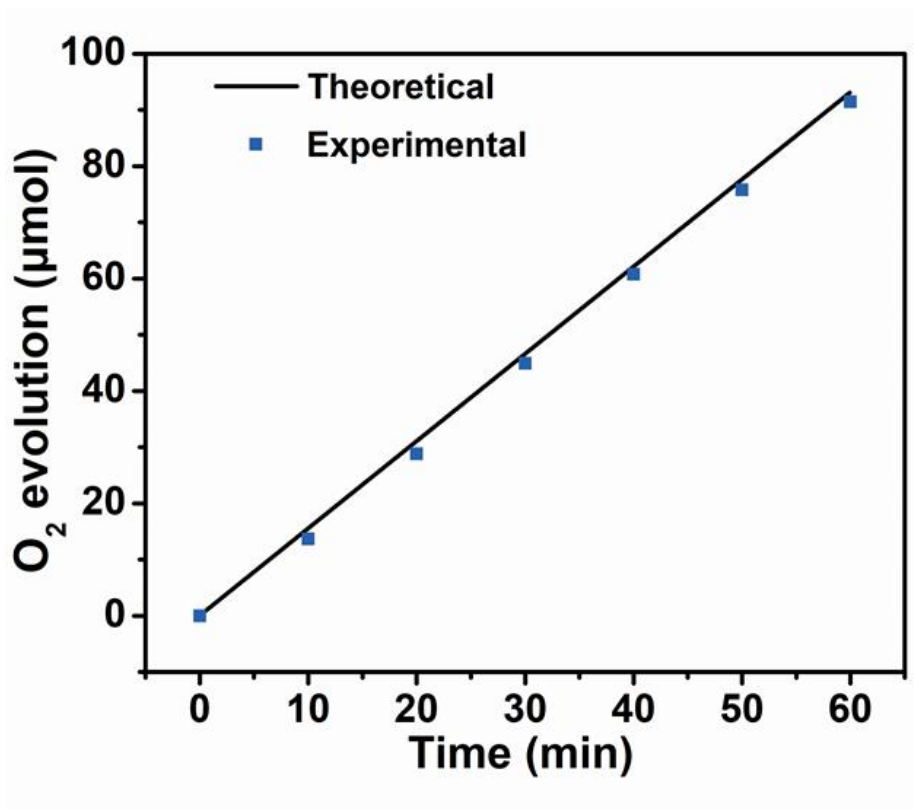

Figure S8 The Faradaic efficiency of  $\text{Fe}_{0.8}\text{Ni}_{0.15}\text{S}_{1.05}$  for OER. Electrocatalytic Faradaic efficiencies of OER over  $\text{Fe}_{0.8}\text{Ni}_{0.15}\text{S}_{1.05}$  at a current density of  $10 \text{ mA}\cdot\text{cm}^{-2}$  measured for 60 min.

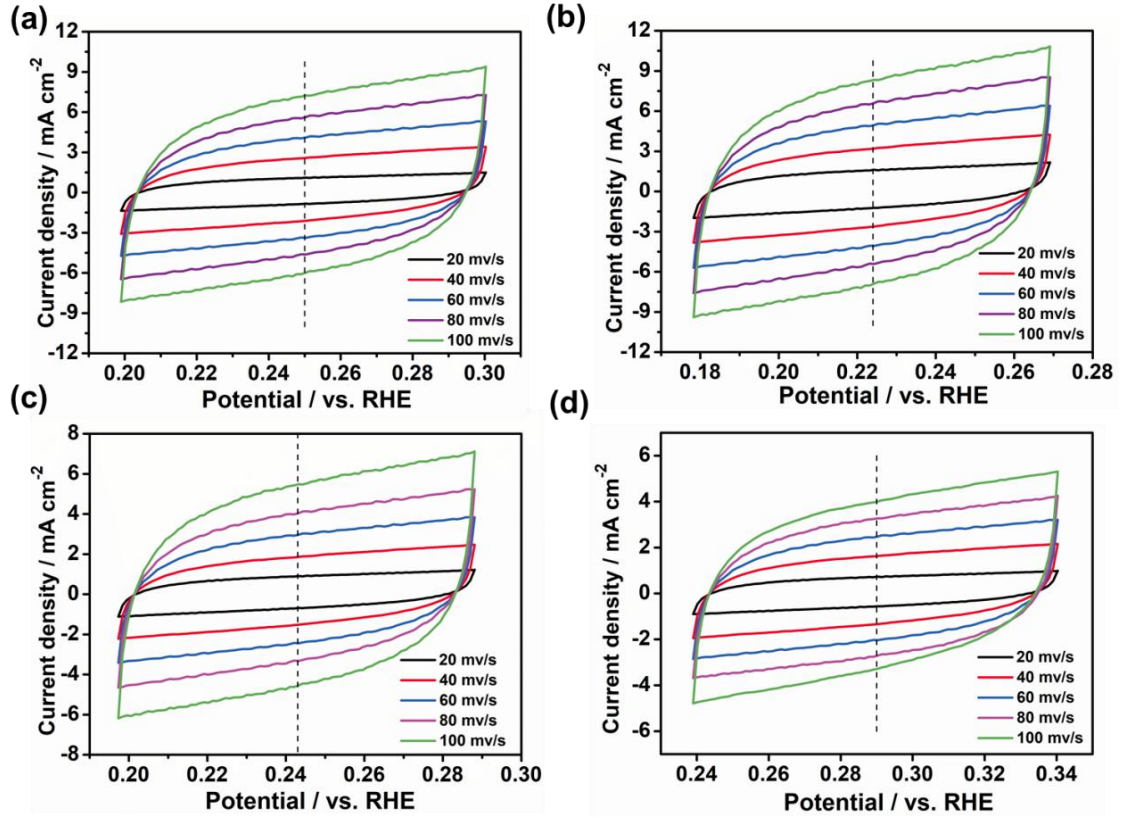

**Figure S9** CV curves in a potential window of 200–300 mV of (a)  $\text{Fe}_{0.75}\text{Ni}_{0.20}\text{S}_{1.05}$ , (b)  $\text{Fe}_{0.8}\text{Ni}_{0.15}\text{S}_{1.05}$ , (c)  $\text{Fe}_{0.85}\text{Ni}_{0.1}\text{S}_{1.05}$  and (d)  $\text{Fe}_{0.9}\text{Ni}_{0.05}\text{S}_{1.05}$  electrode.

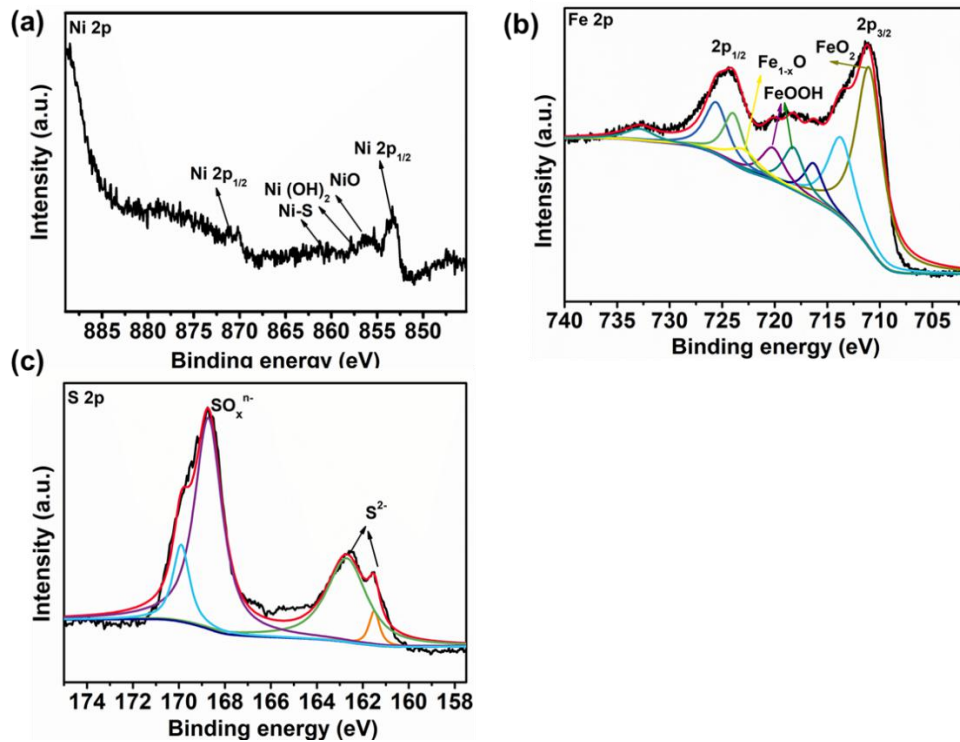

**Figure S10** (a) Ni 2p, (b) Fe 2p and (c) S 2p high-resolution XPS of  $\text{Fe}_{0.8}\text{Ni}_{0.15}\text{S}_{1.05}$  catalyst after OER test.

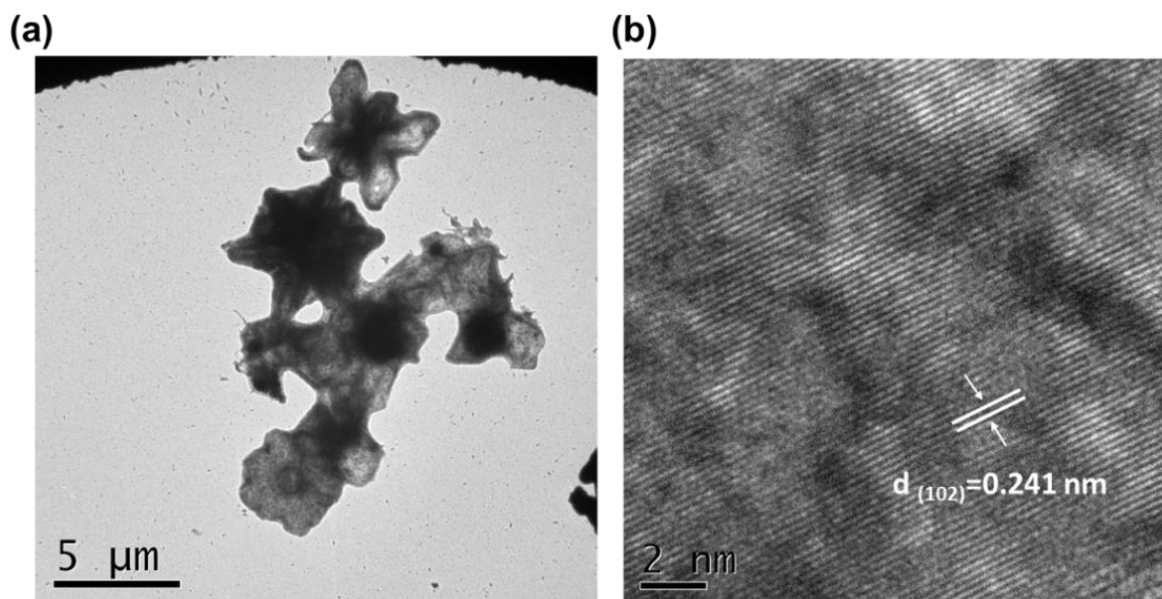

**Figure S11** TEM images of  $\text{Fe}_{0.8}\text{Ni}_{0.15}\text{S}_{1.05}$  catalyst after OER test.

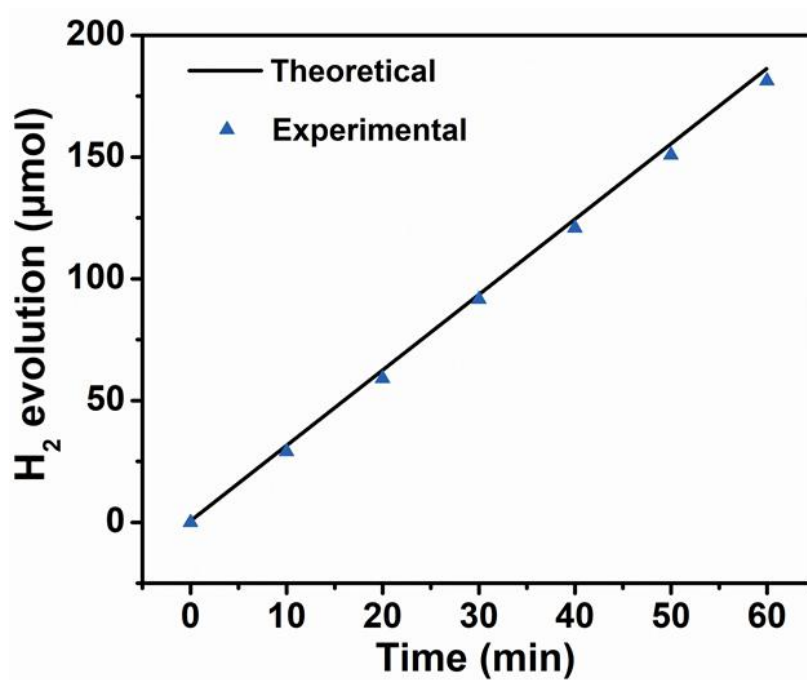

**Figure S12** The Faradaic efficiency of  $\text{Fe}_{0.8}\text{Ni}_{0.15}\text{S}_{1.05}$  for HER. Electrocatalytic Faradaic efficiencies of HER over  $\text{Fe}_{0.8}\text{Ni}_{0.15}\text{S}_{1.05}$  at a current density of  $10 \text{ mA}\cdot\text{cm}^{-2}$  measured for 60 min.

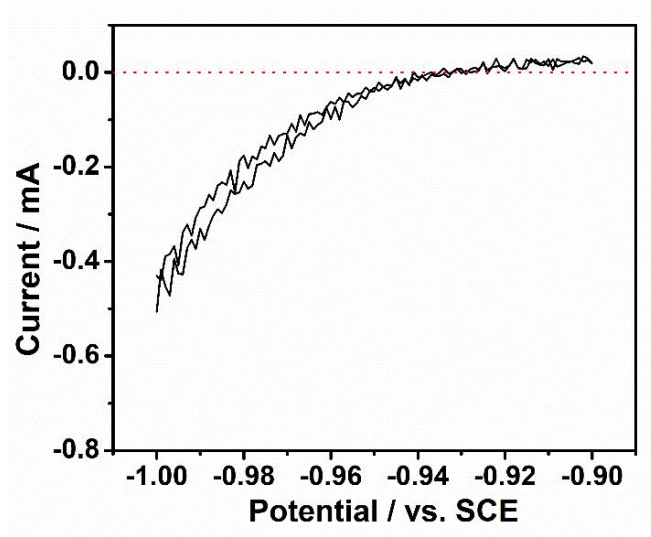

### RHE calibration

In all electrochemical tests, we use Hg/HgO electrode as the reference electrode. The calibration was performed using a Platinum wire as the working electrode in 1 M KOH solutions under H<sub>2</sub>-saturated condition. The CV curves were test in 1.0 mol/L (M) KOH at a scan rate of 1 mV/s. The average value of the two potentials when the current crosses zero is used as the thermodynamic potential of the hydrogen electrode reaction.

$$E_{RHE} = E_{Hg/HgO} + 0.928$$



**Table S1**ICP results for Fe<sub>0.95-x</sub>Ni<sub>x</sub>S<sub>1.05</sub> catalysts.

|                                                        | Fe        | Ni         | S          |
|--------------------------------------------------------|-----------|------------|------------|
| lin bk                                                 | < 0.00011 | < -0.00059 | < -0.00639 |
| Fe <sub>0.95</sub> S <sub>1.05</sub>                   | 1.2666    | < -0.00077 | 1.4132     |
| Fe <sub>0.9</sub> Ni <sub>0.05</sub> S <sub>1.05</sub> | 1.2131    | 0.0711     | 1.4666     |
| Fe <sub>0.85</sub> Ni <sub>0.1</sub> S <sub>1.05</sub> | 1.1343    | 0.1346     | 1.4936     |
| Fe <sub>0.8</sub> Ni <sub>0.15</sub> S <sub>1.05</sub> | 1.0785    | 0.2113     | 1.4864     |
| Fe <sub>0.75</sub> Ni <sub>0.2</sub> S <sub>1.05</sub> | 1.0132    | 0.2438     | 1.4568     |

**Table S2**The  $R_{ct}$  value of Fe<sub>0.95-x</sub>Ni<sub>x</sub>S<sub>1.05</sub> catalysts.

| Catalysts                                              | $R_{ct}$ ( $\Omega$ ) |
|--------------------------------------------------------|-----------------------|
| Fe <sub>0.95</sub> S <sub>1.05</sub>                   | 22.5                  |
| Fe <sub>0.9</sub> Ni <sub>0.05</sub> S <sub>1.05</sub> | 4.593                 |
| Fe <sub>0.85</sub> Ni <sub>0.1</sub> S <sub>1.05</sub> | 5.293                 |
| Fe <sub>0.8</sub> Ni <sub>0.15</sub> S <sub>1.05</sub> | 1.553                 |
| Fe <sub>0.75</sub> Ni <sub>0.2</sub> S <sub>1.05</sub> | 3.909                 |

## References

1. Y. Liu, S. Yin and P. K. Shen, *ACS Applied Materials & Interfaces*, 2018, **10**, 23131-23139.
2. P. Ganesan, A. Sivanantham and S. Shanmugam, *Journal of Materials Chemistry A*, 2016, **4**, 16394-16402
3. P. Ma, S. Luo, Y. Luo, X. Huang, M. Yang, Z. Zhao, F. Yuan, M. Chen and J. Ma, *Journal of Colloid and Interface Science*, 2020, **574**, 241-250
4. W. Zhu, X. Yue, W. Zhang, S. Yu, Y. Zhang, J. Wang, J. Wang, *Chemical Communications*, 2016, **52**, 1486-1489.
5. S. Chen, Z. Kang, X. Zhang, J. Xie, H. Wang, W. Shao, X. Zheng, W. Yan, B. Pan and Y. Xie, *ACS Central Science*, 2017, **3**, 1221-1227.
6. Y. Liang, Y. Li, H. Wang, J. Zhou, J. Wang, T. Regier and H. Dai, *Nature Materials*, 2011, **10**, 780-786.
